# Supplementary material for: Efficient corrosion inhibition by sugarcane purple rind extract for carbon steel in HCl solution: mechanism analyses by experimental and in silico insights
Source: Royal Society of Chemistry journal article supplement (doi:10.1039/d1ra04976c), 2021-01-01
Supplement: d1ra04976c1.pdf [file d1ra04976c1.pdf]

## ***Supporting Information***

### **Efficient corrosion inhibition of sugarcane purple rind extract for carbon steel in HCl solution: Mechanism analyses by experimental and *in-silico* insights**

Siguang Meng,<sup>a</sup> Zining Liu,<sup>a</sup> Xiaoqi Zhao,<sup>a</sup> Baomin Fan,<sup>\*a</sup> Hao Liu,<sup>a</sup> Mao Guo,<sup>a</sup> Hua Hao<sup>b</sup>

<sup>a</sup> College of Chemistry and Materials Engineering, Beijing Technology and Business University, Beijing 100048, China

<sup>b</sup> Institute of Chemistry, Chinese Academy of Sciences, Beijing 100190, China

Corresponding author: Baomin Fan, email: [fanbaomin@btbu.edu.cn](mailto:fanbaomin@btbu.edu.cn), ORCID: 0000-0002-0430-5712

Siguang Meng and Zining Liu equally contributed to this paper.

**Table S1 Nominal chemical components of Q235 steel**

| Item        | C    | Mn  | Si   | S    | P     | Fe      |
|-------------|------|-----|------|------|-------|---------|
| Content (%) | 0.22 | 1.4 | 0.35 | 0.05 | 0.045 | Balance |

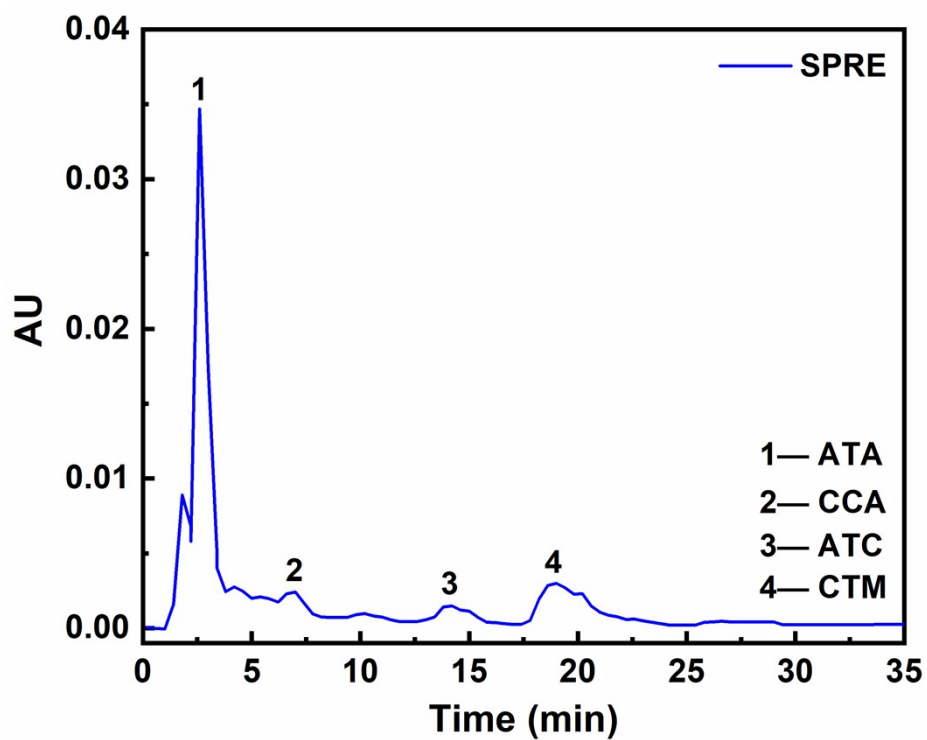

**Fig. S1 HPLC chromatogram of SPRE: specific compound is identified by the standard substance**

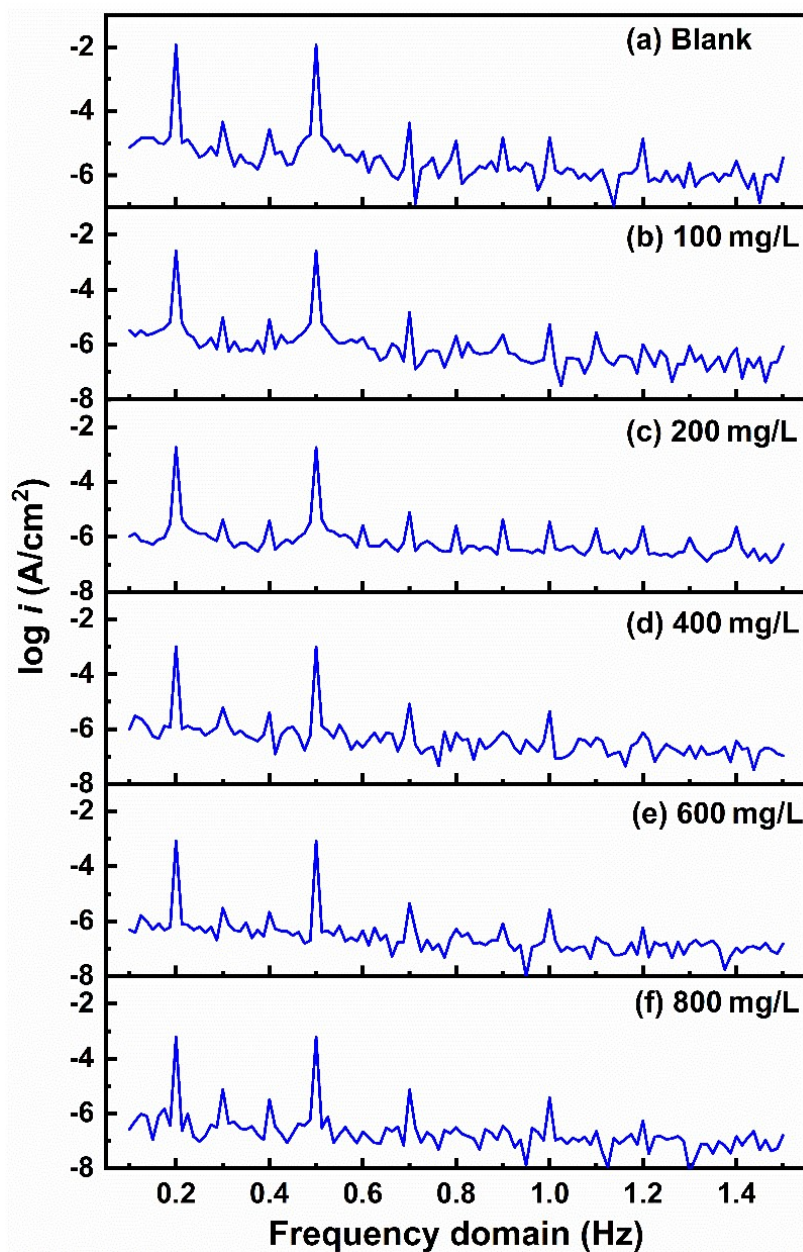

**Fig. S2 Electrochemical frequency modulation spectra of C-steel in 1 M HCl solution without and with different concentrations of SPRE**

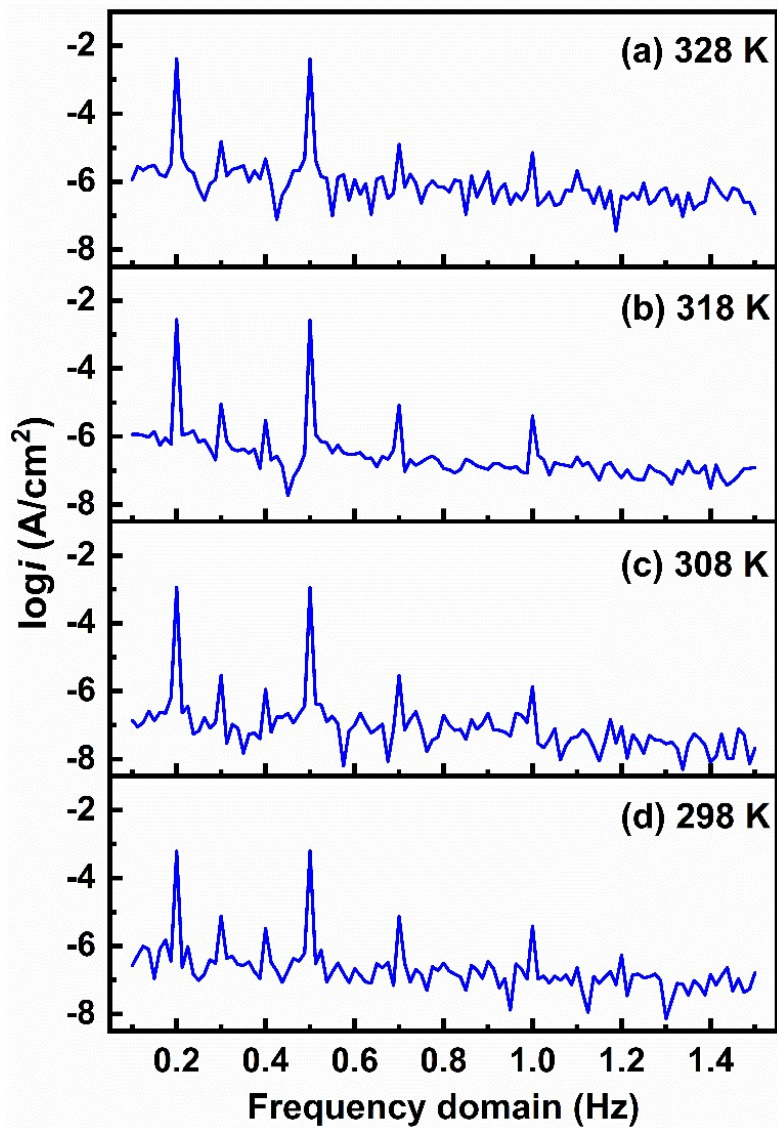

**Fig. S3 Electrochemical frequency modulation spectra of C-steel in 1 M HCl solution with 800 mg/L SPRE at pre-set temperatures**

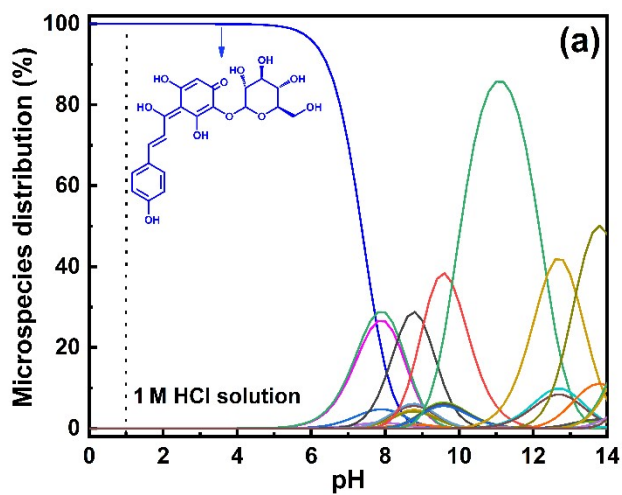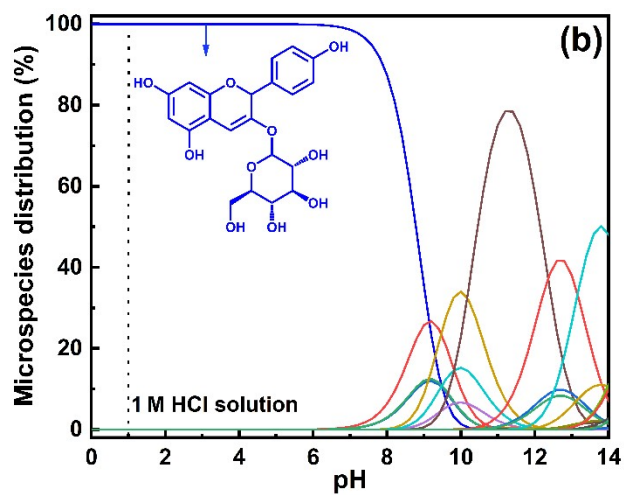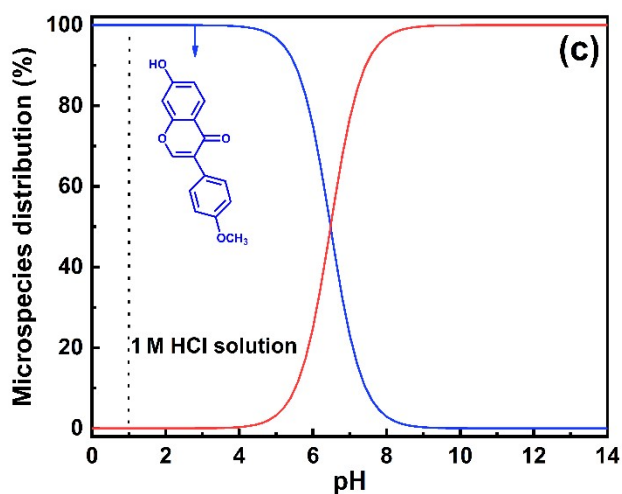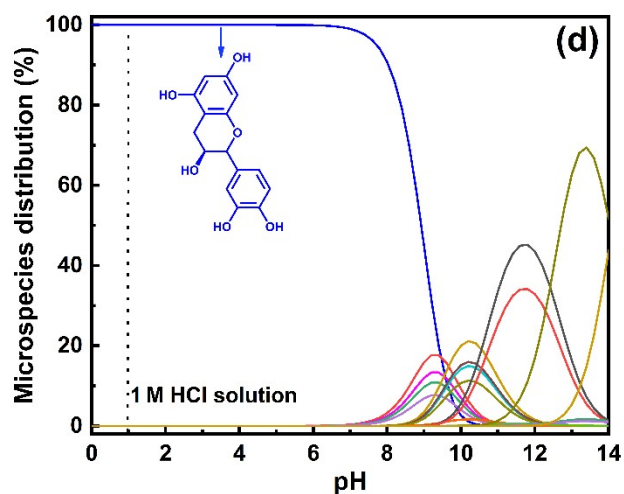

Fig. S4 Microspecies analyses of carthamin (a), anthocyanin (b), anthocyanin (c) and catechinic acid (d) at a full range of pH values

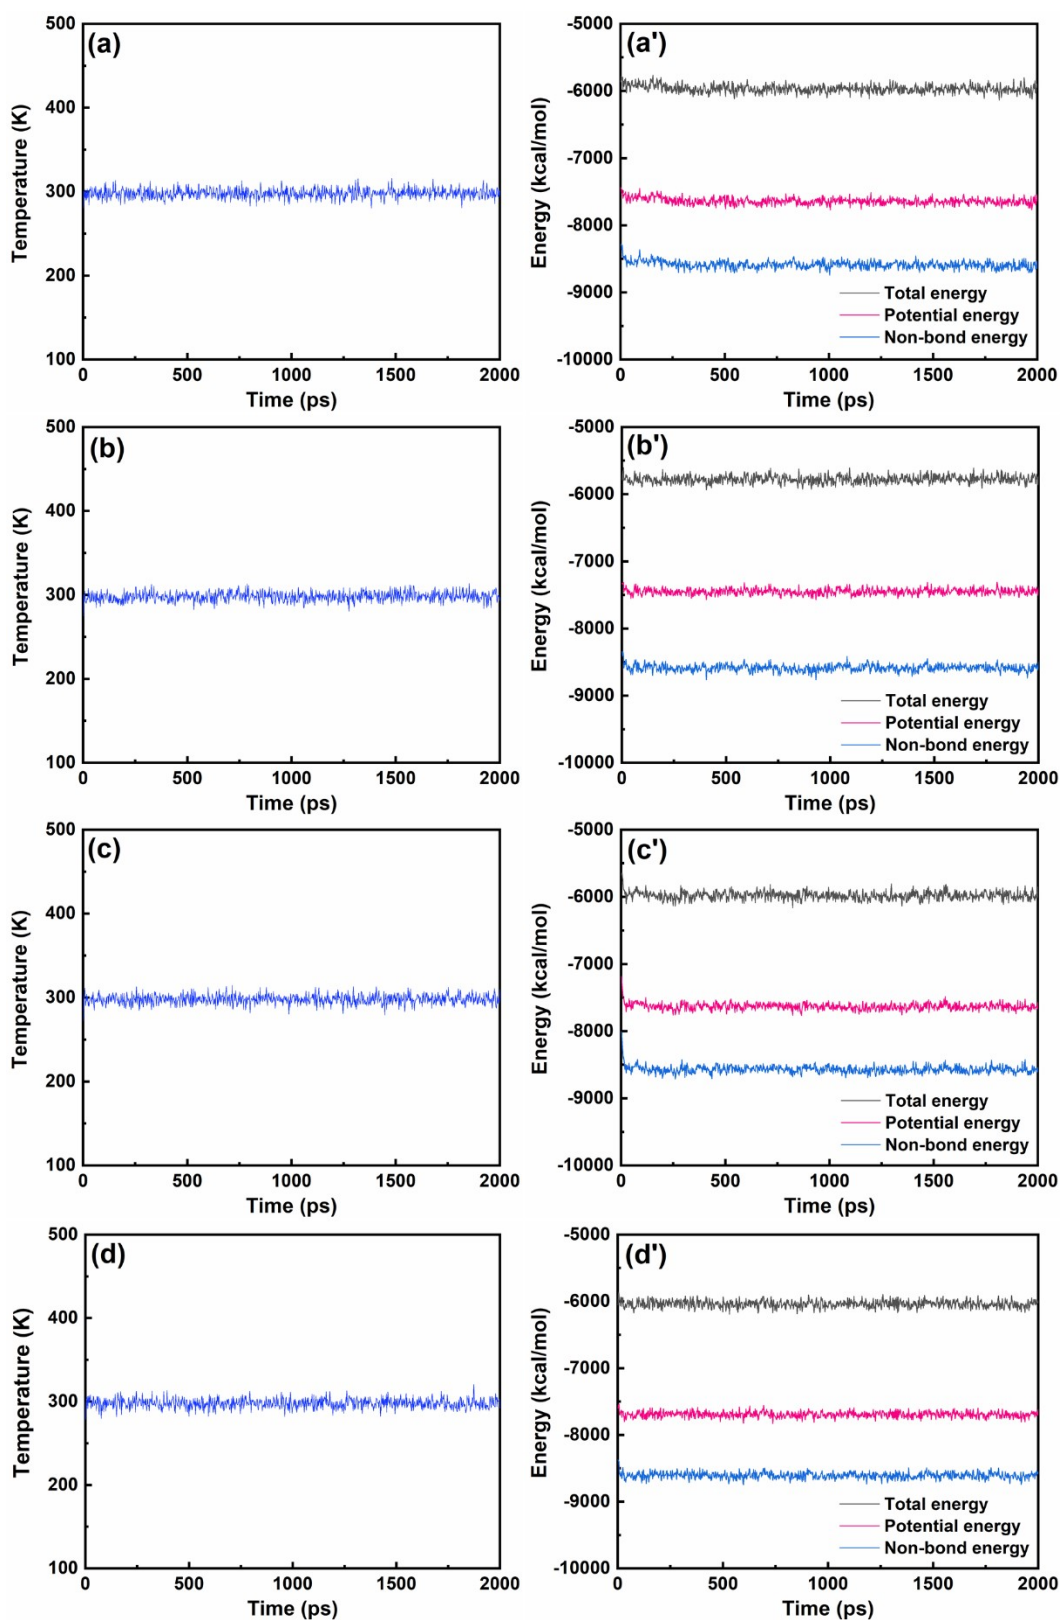

**Fig. S5 Equilibrium of temperature (left) and energies (right) for the adsorption process of carthamin (a and a'), anthocyanin (b and b'), anthoxanthin (c and c') and catechinic acid (d and d') on Fe (1 1 0)**

**Table S2 Comparison of anticorrosion capability of typical polyphenol-/flavonoids-based plant extract for C-steel in acidic media reported in recent years**

| Plant extract/Ref.                               | Component type         | Medium                               | Maximum $\eta_w$ (%) |
|--------------------------------------------------|------------------------|--------------------------------------|----------------------|
| <i>Ficus tikoua</i> leave <sup>R1</sup>          | Polyphenols/flavonoids | 1 M HCl                              | 95.8% at 298 K       |
| <i>Tamarix aphylla</i> bark <sup>R2</sup>        | Polyphenols            | Acidic seawater                      | 85.0% at 298 K       |
| <i>Rhoeo discolor</i> leave <sup>R3</sup>        | Flavonoids             | 0.5 M HCl                            | 85.3% at 303 K       |
| <i>Hymenaea stigonocarpa</i> <sup>R4</sup>       | Polyphenols/flavonoids | 0.5 M H <sub>2</sub> SO <sub>4</sub> | 90% at 298 K         |
| <i>Ruta chalepensis</i> <sup>R5</sup>            | Flavonoids             | 1 M HCl                              | 80.65% at 298 K      |
| <i>Gentiana olivieri</i> <sup>R6</sup>           | Polyphenols            | 0.5 M HCl                            | 93.7% at 298 K       |
| <i>Aerva lanata</i> flower <sup>R7</sup>         | Polyphenols/flavonoids | 1 M HCl                              | 88% at 298 K         |
| <i>Cannabis sativa</i> leave <sup>R8</sup>       | Polyphenols            | 0.5 M H <sub>2</sub> SO <sub>4</sub> | 97.31% at 298 K      |
| <i>Arbutus unedo</i> L. leave <sup>R9</sup>      | Polyphenols/flavonoids | 1 M HCl                              | 91.72% at 298 K      |
| Walnut green husk <sup>R10</sup>                 | Flavonoids             | 3 M H <sub>3</sub> PO <sub>4</sub>   | 73.4% at 298 K       |
| <i>Cryptocarya nigra</i> <sup>R11</sup>          | Polyphenols            | 1 M HCl                              | 91.05% at 298 K      |
| <i>Acacia nilotica</i> leave/stem <sup>R12</sup> | Polyphenols            | 0.5 M H <sub>2</sub> SO <sub>4</sub> | 89% at 298 K         |
| SPRE in this study                               | Polyphenols/flavonoids | 1 M HCl                              | 94.7% at 298 K       |

## References

- R1 Q. Wang, B. Tan, H. Bao, Y. Xie, Y. Mou, P. Li, D. Chen, Y. Shi, X. Li and W. Yang, *Bioelectrochemistry*, 2019, **128**, 49-55.
- R2 I. H. Ali, *Molecules*, 2021, **26**, 3679.
- R3 G. Netravati, P. Vittalgouda, R. B. Muralidhara, G. G. M and G. Krishna, *J. Environ. Eng. Sci.*, 2021, **16**, 66-76.
- R4 E. d. B. Policarpi and A. Spinelli, *J. Taiwan Inst. Chem. Eng.*, 2020, **116**, 215-222.
- R5 M. A. Benghalia, C. Fares, A. Khadraoui, M. H. Meliani, R. K. Suleiman, A. A. Sorour, I. M. Dmytrakh and Z. Azari, *Environ. Eng. Manage. J.*, 2019, **18**, 2009-2021.
- R6 E. Baran, A. Cakir and B. Yazici, *Arabian J. Chem.*, 2019, **12**, 4303-4319.
- R7 N. R. J. Hynes, R. M. Selvaraj, T. Mohamed, A. M. Mukesh, K. Olfa and M. P. Nikolova, *Chem. Pap.*, 2021, **75**, 1165-1174.
- R8 R. Haldhar, D. Prasad, N. Mandal, F. Benhiba, I. Bahadur and O. Dagdag, *Colloid. Surf. A-Physicochem. Eng. Asp.*, 2021, **614**, 126211.
- R9 S. Abdelaziz, M. Benamira, L. Messaadia, Y. Boughoues, H. Lahmar and A. Boudjerda, *Colloid. Surf. A-Physicochem. Eng. Asp.*, 2021, **619**, 126496.

- R10 X. H. Li, S. D. Deng, G. B. Du and X. G. Xie, *J. Taiwan Inst. Chem. Eng.*, 2020, **114**, 263-283.
- R11 M. Faiz, A. Zahari, K. Awang and H. Hussin, *RSC Adv.*, 2020, **10**, 6547-6562.
- R12 F. M. Mahgoub, A. M. Hefnawy and E. H. Abd Alrazzaq, *Desalin. Water Treat.*, 2019, **169**, 49-58.
